# Supplementary material for: Synthesis of an ordered nanoporous Cu/Ni/Au film for sensitive non-enzymatic glucose sensing
Source: Royal Society of Chemistry journal article supplement (doi:10.1039/d0ra01224f), 2020-01-01
Supplement: d0ra01224f1.pdf [file d0ra01224f1.pdf]

## Supporting Information

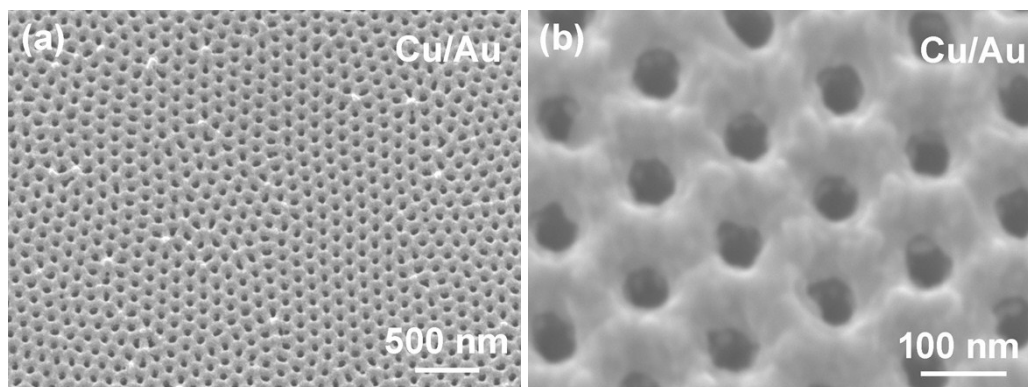

**Figure S1** (a) and (b) SEM images of the nanoporous Cu/Au film.

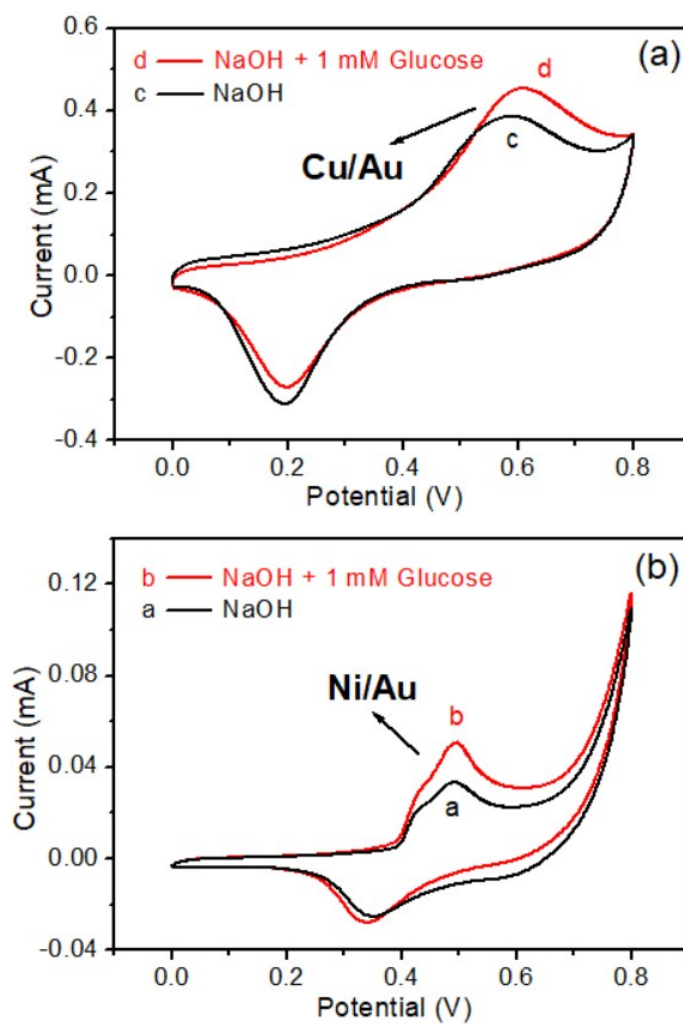

**Figure S2** (a) CV curves of the nanoporous Cu/Au film electrode in the absence (curve a) and presence (curve b) of glucose in 0.2 M NaOH solution. (b) CV curves of the nanoporous Ni/Au film electrode in the absence (curve c) and presence (curve d) of glucose.
